# Supplementary material
Source: PubMed Central journal article supplement (PMC2794094)
Supplement: supp_75_24_7734__1.pdf [file supp_75_24_7734__1.pdf]

```

3a -----AAAGTGGGGCCCGCTCAGACGGCTGGACGGCCCGCTGCACGGCAACGTTG
5b -----CGCGTCAGACGGCTGGACGGCCCGCTGCACGGCAACGTTG

3a GGGGAGGAAAGTCCGGGCTCCACGTAAGCACGGTGCCGATAACGTTCCGGGGGGGTGAC
5b GGGGAGGAAAGTCCGGGCTCCACGTAAGCACGGTGCCGATAACGTTCCGGGGGGGTGAC

3a CCTAGGAAAGTGCCACAGAAAGCAAACG-----
5b CCTAGGAAAGTGCCACAGAAAGCAAACCGCGCTGTCGCGAGC-----
A08 --CTAGGAAAGTGCCACAGAAAGCAAACCGCGCTGTCGCGACGGTAAGGTTGAAAGG
C07 --CTAGGAAAGTGCCACAGAAAGCAAACCGCGCTGTCGCGACGGTAAGGTTGAAAGG
A06 --CTAGGAAAGTGCCACAGAAAGCAAACCGCGCTGTCGCGACGGTAAGGTTGAAAGG
B07 -----CGCGCGCTGTCGCGACGGTAAGGTTGAAAGG
A09 -----CGCGCGCTGTCGCGACGGTAAGGTTGAAAGG
A10 -----GC CGCTGTCGCGACGGTAAGGTTGAAAGG
F08 --CTAGGAAAGTGCCACAGAAAGCAAACCGCGCTGTCGCGACGGTAAGGTTGAAAGG

A08 GTGCGGTAAAGCGCACCCGGACCCGGCAACGGGAACGGCACGGCAAAACCCACCGGGA
C07 GTGCGGTAAAGCGCACCCGGACCCGGCAACGGGAACGGCACGGCAAAACCCACCGGGA
A06 GTGCGGTAAAGCGCACCCGGACCCGGCAACGGGAACGGCACGGCAAAACCCACCGGGA
B07 GTGCGGTAAAGCGCACCCGGACCCGGCAACGGGAACGGCACGGCAAAACCCACCGGGA
A09 GTGCGGTAAAGCGCACCCGGACCCGGCAACGGGAACGGCACGGCAAAACCCACCGGGA
A10 GTGCGGTAAAGCGCACCCGGACCCGGCAACGGGAACGGCACGGCAAAACCCACCGGGA
F08 GTGCGGTAAAGCGCACCCGGACCCGGCAACGGGAACGGCACGGCAAAACCCACCGGGA

A08 GCAAGACAG-----
C07 GCAAGACT-----
A06 GCAT-----
B07 GCAAGACCAATAGGGGGCAGATTTTCGGCCT-----
A09 GCAAGACC-----
A10 GCAAGATC-----
F08 GCAAGACCAATAGGGGGCAGATTTTCGGCCTTTTGGCCGGAACCAAACCGCGCTTTCGC
H04 -----ATAGGGGGCAGATTTTCGGCCTTTTGGCCGGAACCAAACCGCGCTTTCGC
C05 -----TAGGGGGCAGATTTTCGGCCTTTTGGCCGGAACCAAACCGCGCTTTCGC
F06 -----CGGCTTTTGGCCGGAACCAAACCGCGCTTTCGC
F06 -----CGGCTTTTGGCCGGAACCAAACCGCGCTTTCGC
C04 -----CGGCTTTTGGCCGGAACCAAACCGCGCTTTCGC
A05 -----TGGCCGGAACCAAACCGCGCTTTCGC
002 -----TGGCCGGAACCAAACCGCGCTTTCGC
004 -----TGGCCGGAACCAAACCGCGCTTTCGC
G01 -----TGGCCGGAACCAAACCGCGCTTTCGC
C06 -----CGGACCAAACCGCGCTTTCGC
D06 -----CGGACCAAACCGCGCTTTCGC
E02 -----AACGGCGCTTTCGC

F08 GTAGTCGCCCGGTCGGTCGCGTGAGGCGTCCGGT-----
H04 GTAGTCGCCCGGTCGGTCGCGTGAGGCGTCCGGTAAACGGACGTCCCGGATGAATGGCCG
C05 GTAGTCGCCCGGTCGGTCGCGTGAGGCGTCCGGTAAACGGACGTCCCGATGAATGGCCG
F03 GTAGTCGCCCGGTCGGTCGCGTGAGGCGTCCGGTAAACGGACGTCCCGATGAATGGCCG
G06 GTAGTCGCCCGGTCGGTCGCGTGAGGCGTCCGGTAAACGGACGTCCCGATGAATGGCCG
F06 GTAGTCGCCCGGTCGGTCGCGTGAGGCGTCCGGTAAACGGACGTCCCGATGAATGGCCG
C04 GTAGTCGCCCGGTCGGTCGCGTGAGGCGTCCGGTAAACGGACGTCCCGATGAATGGCCG
A05 GTACTCGCCCGGTCGGTCGCGTGAGGCGTCCGGTAAACGGACGTCCCGATGAATGGCCG
D04 -----GGTCGCGTGAGGCGTCCGGTAAACGGACGTCCCGATGAATGGCCG
B05 -----TCGGTCGCGTGAGGCGTCCGGTAAACGGACGTCCCGATGAATGGCCG
G04 -----TCGGTCGCGTGAGGCGTCCGGTAAACGGACGTCCCGATGAATGGCCG
002 GTAGTCGCCCGGTCGGTCGCGTGAGGCGTCCGGTAAACGGACGTCCCGATGAATGGCCG
A03 -----TCGGTCGCGTGAGGCGTCCGGTAAACGGACGTCCCGATGAATGGCCG
G02 -----TCGGTCGCGTGAGGCGTCCGGTAAACGGACGTCCCGATGAATGGCCG
004 GTAGTCGCCCGGTCGGTCGCGTGAGGCGTCCGGTAAACGGACGTCCCGATGAATGGCCG
G01 GTAGTCGCCCGGTCGGTCGCGTGAGGCGTCCGGTAAACGGACGTCCCGATGAATGGCCG
C06 GTAGTCGCCCGGTCGGTCGCGTGAGGCGTCCGGTAAACGGACGTCCCGATGAATGGCCG
D06 GTAGTCGCCCGGTCGGTCGCGTGAGGCGTCCGGTAAACGGACGTCCCGATGAATGGCCG
H02 -----TCGGTCGCGTGAGGCGTCCGGTAAACGGACGTCCCGATGAATGGCCG
E02 GTAGTCGCCCGGTCGGTCGCGTGAGGCGTCCGGTAAACGGACGTCCCGATGAATGGCCG
D02 -----TCGGTCGCGTGAGGCGTCCGGTAAACGGACGTCCCGATGAATGGCCG
003 -----TCGGTCGCGTGAGGCGTCCGGTAAACGGACGTCCCGATGAATGGCCG
C02 -----CGGTCGCGTGAGGCGTCCGGTAAACGGACGTCCCGATGAATGGCCG
D03 -----TCGGTCGCGTGAGGCGTCCGGTAAACGGACGTCCCGATGAATGGCCG

002 TCGCCATGGGTAACCATGGGACAGAACCCGGCTTAC-----
A03 TCGCCATGGGTAACCATGGGACAGAACCCGGCTTACAGGCCGT-----
G02 TCGCCATGGGTAACCATGGGACAGAACCCGGCTTACAGGCCGT-----
004 TCGCCATGGGTAACCATGGGACAGAACCCGGCTTACAGGCCGTCTG-----
G01 TCGCCATGGGTAACCATGGGACAGAACCCGGCTTACAGGCCGTCTGAGC-----
C06 TCGCCATGGGTAACCATGGGACAGAACCCGGCTTACAGGCCGTCTGAGCGCAT-----
D06 TCGCCATGGGTAACCATGGGACAGAACCCGGCTTACAGGCCGTCTGAGCGCAT-----
H02 TCGCCATGGGTAACCATGGGACAGAACCCGGCTTACAGGCCGTCTGAGCGCAT-----
E02 TCGCCATGGGTAACCATGGGACAGAACCCGGCTTACAGGCCGTCTGAGCGCAT-----
D02 TCGCCATGGGTAACCATGGGACAGAACCCGGCTTACAGGCCGTCTGAGCGCAT-----
003 TCGCCATGGGTAACCATGGGACAGAACCCGGCTTACAGGCCGTCTGAGCGCAT-----
C02 TCGCCATGGGTAACCATGGGACAGAACCCGGCTTACAGGCCGTCTGAGCGCAT-----
D03 TCGCCATGGGTAACCATGGGACAGAACCCGGCTTACAGGCCGTCTGAGCGCATTT-----

```

## Ohuchi & Schüler, Supplemental Figure 1.

**Supplemental Figure 1.** RNase P RNA fragments cloned from RNAs associated with the C5-fusion magnetosome.
